# Supplementary material
Source: PubMed Central journal article supplement (PMC2096194)
Supplement: NIHMS1198-supplement-supplementary.pdf [file NIHMS1198-supplement-supplementary.pdf]

## Supplementary Methods

### Interaction with the BRCA2 C-terminus Protects RAD51–DNA

#### Filaments from Disassembly by BRC repeats

Owen Richard Davies & Luca Pellegrini

#### Preparation of DNA substrates.

The ds-ssDNA substrate was created by annealing the 24-base oligonucleotide (5'-CAGTCTATTATAGGTAAATCATGG-3') with the 48-base oligonucleotide (5'-CCATGATTTACCTATAATAGACTGGACAGATATTACATATTGATTGCG-3').

The 1.2 kbp linear dsDNA substrate was created through PCR amplification of the gene encoding the B subunit of *E. cuniculi* DNA polymerase  $\alpha$ , using primers 5'-ATACTAAGATCTAATGGACTTCGACAGGCAGGTTTTCAAGACG-3', and 5'-TTTTTTGGTACCTTATTTTCTATTTCTTGCCGGATCAGGG-3'.
